# Supplementary material
Source: Royal Society of Chemistry journal article supplement (doi:10.1039/d6tc00399k)
Supplement: d6tc00399k1.pdf [file d6tc00399k1.pdf]

Supplementary Information

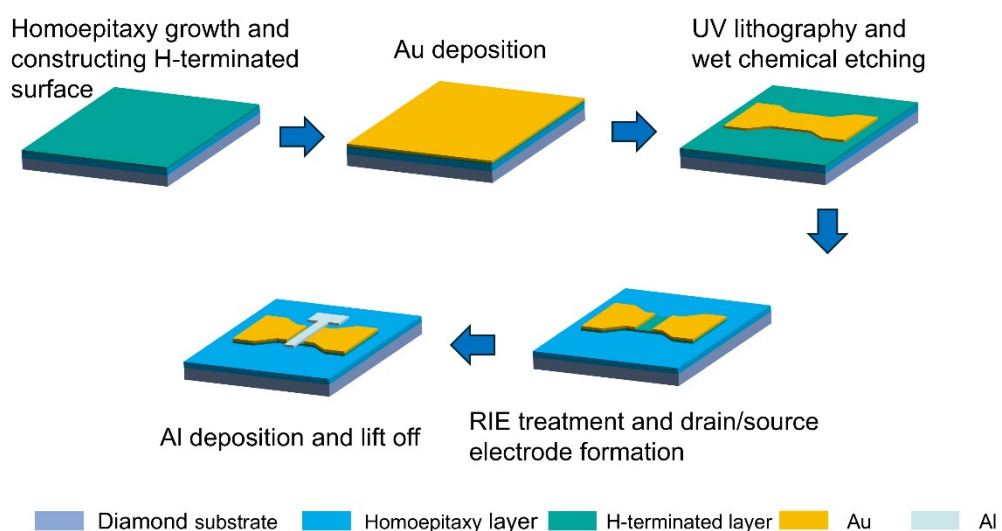

Fig. S1: Schematic diagram of the H-terminated diamond phototransistor fabrication.

Table S1: Homoepitaxy growth parameters of diamond

| Input power | H <sub>2</sub> gas flow | CH <sub>4</sub> gas flow | Pressure | Temperature | Duration |
|-------------|-------------------------|--------------------------|----------|-------------|----------|
| 3.8 kW      | 400 sccm                | 12 sccm                  | 13 kPa   | 950 °C      | 2 h      |

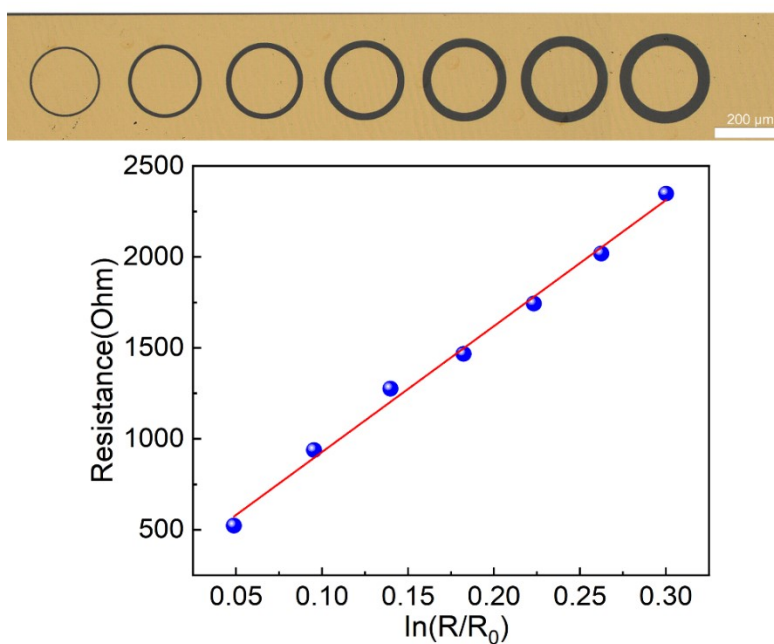

Fig. S2: Optical image of circular-type TLM pattern and the results of the linear fitting resistance.

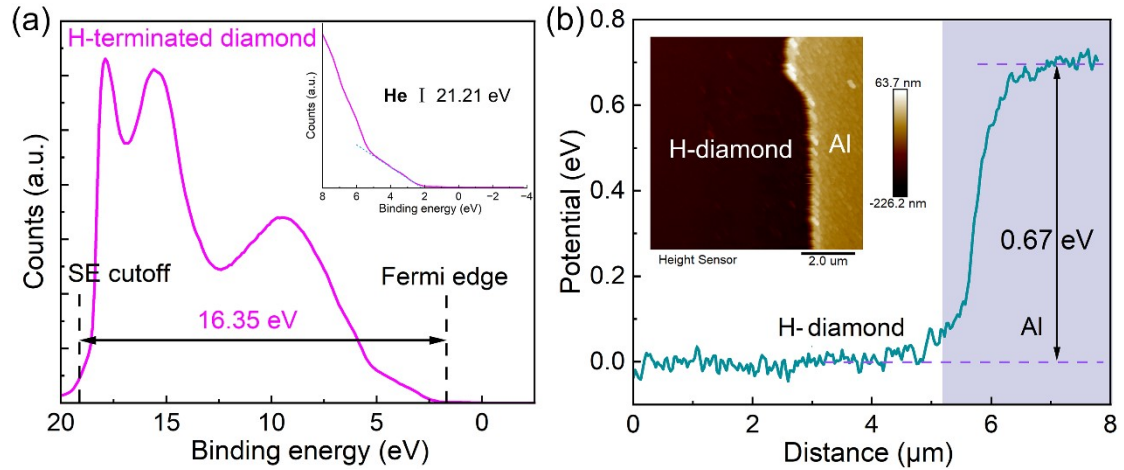

**Fig. S3:** (a) UPS spectra of the H-Diamond excited by He I photons ( $h\nu = 21.2$  eV), the affinity energy ( $\chi$ ) of H-diamond is calculated to be  $-0.38$  eV.<sup>1</sup> (b) Potential distribution of Al on h-diamond surface, the Schottky barrier between Al and H-diamond is  $0.67$  eV.<sup>2</sup>

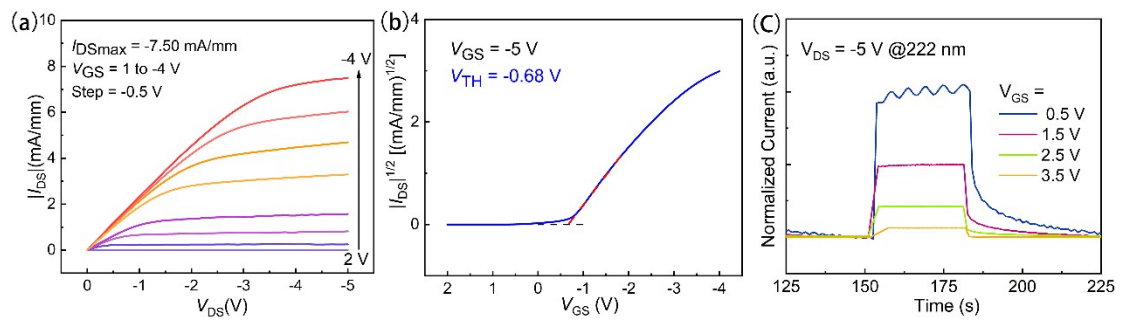

**Fig. S4:** (a) Output characteristics of the 15-minute treated H-diamond phototransistor under various  $V_{GS}$  ranging from 2 to  $-4$  V. (b) The evolutions of  $|I_{DS}|^{1/2}$  depending on  $V_{GS}$  under a constant  $V_{DS}$  of  $-5$  V. (c) Comparison of rise and decay times at various  $V_{GS}$  and a constant  $V_{DS}$  of  $-5$  V.

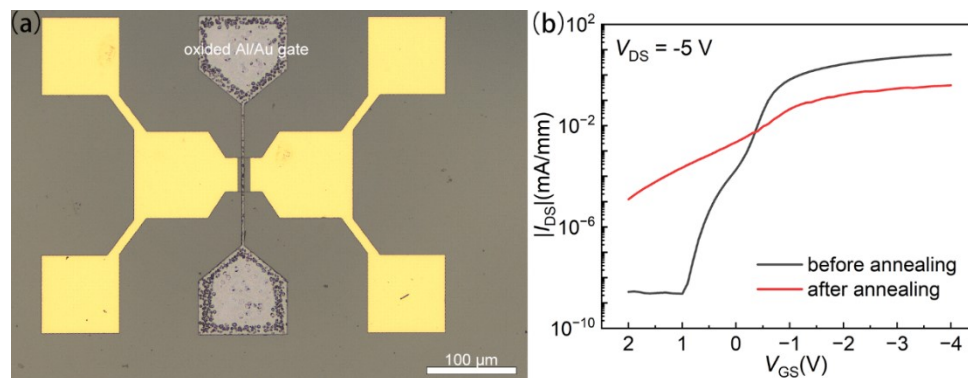

**Fig. S5:** (a) Optical image of the annealed H-diamond phototransistor. (b) Transfer characteristics curves of the H-diamond phototransistor before and after annealing.

**Table S2:** Comparison of the Performance of Single-crystal Diamond-Based Photodetectors

| Structure of the device | Light/dark current ratio | Responsivity ( $A W^{-1}$ ) | Detectivity (Jones)   | Rise/decay time        | Ref.      |
|-------------------------|--------------------------|-----------------------------|-----------------------|------------------------|-----------|
| MSM                     | 160                      | 84.3                        | $< 10^{12}$           | $< 240ms$              | 3         |
| MSM                     | $10^5$ - $10^6$          | 22.6                        | $4.2 \times 10^{14}$  | 13 ns/303.8 $\mu s$    | 4         |
| MSM                     | -                        | 0.015                       | -                     | -/0.086 ms             | 5         |
| MSM                     | $1.4 \times 10^4$        | 56.3                        | $1.26 \times 10^{13}$ | 1.03 ns/1.05 ns        | 6         |
| Homojunction            | -                        | 0.0035                      | $1.13 \times 10^{12}$ | 0.016 s/2.2 s          | 7         |
| MSM                     | $2.4 \times 10^8$        | 0.083                       | -                     | -                      | 8         |
| MSM photodiode          | -                        | 524.9                       | $3.42 \times 10^{15}$ | $< 16 \mu s/120 \mu s$ | 9         |
| phototransistor         | $2.11 \times 10^6$       | $2.48 \times 10^4$          | $5.08 \times 10^9$    | 88 ms/36 ms            | 10        |
| phototransistor         | $2.2 \times 10^7$        | $2.16 \times 10^4$          | $9.36 \times 10^{11}$ | 25.5 ms                | 11        |
| phototransistor         | $8.68 \times 10^6$       | $1.42 \times 10^7$          | $2.79 \times 10^{13}$ | 2.04 s/5.49 s          | This work |

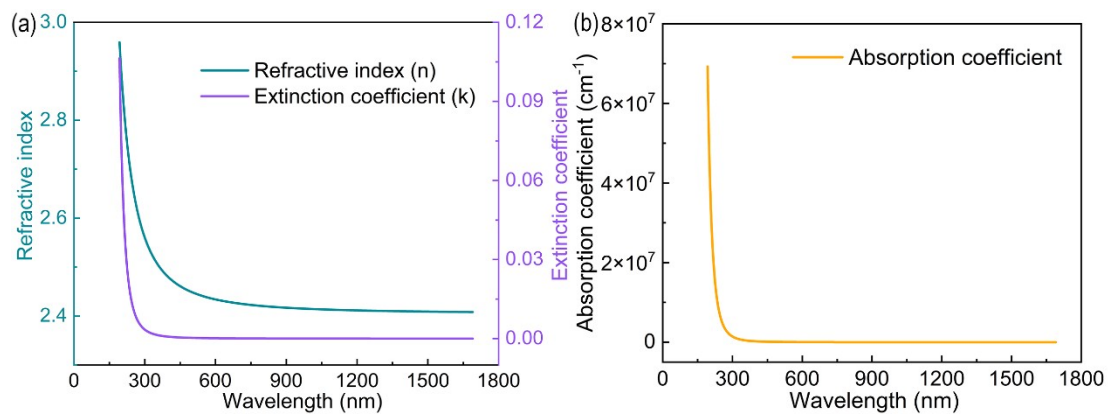

**Fig. S6.** (a) Refractive index (n) and extinction coefficient (k) of H-diamond as a function of wavelength. (b) Absorption coefficient ( $\alpha$ ) of H-diamond derived from the extinction coefficient (k) using the equation  $\alpha = 4\pi k/\lambda^{12}$ .

## References

- 1 W. Zhang, B. Liu, S. Zhang, X. Zhang, P. Qiao, B. Liang, S. Fan, T. Su, K. Liu, B. Dai and J. Zhu, *J. Phys. Chem. Lett.*, 2024, **15**, 9301–9310.
- 2 X. Guo, B. Yang, X. Zhang, J. Lu, M. Huang, N. Huang, L. Liu and X. Jiang, *J. Mater. Chem. C*, 2024, **12**, 15483–15490.
- 3 K. Gu, Z. Zhang, T. Ohsawa, M. Imura, J. Huang, Y. Koide and M. Liao, *J. Mater. Chem. C*, 2025, **13**, 6816–6822.
- 4 M. Qiu, Z. Jia, M. Yang, M. Li, Y. Shen, C. Liu, K. Nishimura, N. Jiang, B. Wang, C.-T. Lin and Q. Yuan, *Diamond Relat. Mater.*, 2024, **144**, 110996.
- 5 F. N. Li, H. W. Bao, Y. Li, F. Ma and H. X. Wang, *Appl. Surf. Sci.*, 2023, **636**, 157818.
- 6 M. Feng, P. Jin, X. Meng, P. Xu, X. Huo, G. Zhou, P. Qu, J. Wu and Z. Wang, *J. Phys. D: Appl. Phys.*, 2022, **55**, 404005.
- 7 Y. Wu, X. Yang, J. Qin, S. Lai, Z. Zhang, C. Lv, H. Liu, J. Zang and C. Shan, *ACS Photonics*, 2025, **12**, 5165–5172.
- 8 Q. Cai, T. Zhi, H. You, P. Shao, K. Chen, J. Wang, H. Guo, J. Xue, T. Tao, B. Liu, Z. Xie, X. Cao, H. Lu, Y. Zheng, R. Zhang and D. Chen, *Adv. Opt. Mater.*, 2024, **12**, 2301333.

- 9 C.-N. Lin, Z.-F. Zhang, Y.-J. Lu, X. Yang, Y. Zhang, X. Li, J.-H. Zang, X.-C. Pang, L. Dong and C.-X. Shan, *Carbon*, 2022, **200**, 510–516.
- 10 L. Ge, Y. Peng, B. Li, X. Chen, M. Xu, X. Wang, Y. Cui, D. Wang, J. Han, K. Y. Cheong, P. Tanner, M. Zhao and X. Xu, *IEEE Electron Device Lett.*, 2022, **43**, 1271–1274.
- 11 L. Ge, B. Li, G. Li, X. Wang, K. Y. Cheong, Y. Peng, J. Han, S. Li, Y. Cui, Y. Zhong, P. Cui, D. Wang, M. Xu and X. Xu, *J. Phys. Chem. Lett.*, 2023, **14**, 592–597.
- 12 R. Kohandani and S. S. Saini, *Nanotechnology*, 2022, **33**, 395204.
